# Supplementary material for: Porous chromium-based ceramic monoliths: oxides (Cr2O3), nitrides (CrN), and carbides (Cr3C2)
Source: Royal Society of Chemistry journal article supplement (doi:10.1039/c3ta13725b), 2013-11-01
Supplement: c3ta13725b.pdf [file c3ta13725b.pdf]

## Supporting Information

### Porous Chromium-Based Ceramic Monoliths; Oxides ( $\text{Cr}_2\text{O}_3$ ), Nitrides ( $\text{CrN}$ ), and Carbides ( $\text{Cr}_3\text{C}_2$ )

By Yasuki KIDO, George HASEGAWA,\* Kazuyoshi KANAMORI, and Kazuki NAKANISHI

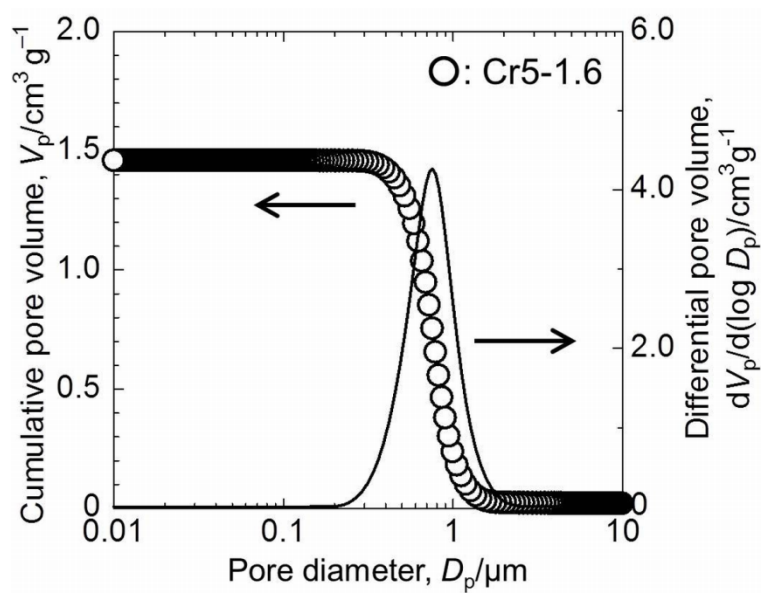

Figure S1 Macropore size distribution of Cr5-1.6 measured by mercury porosimetry. The mean macropore diameter is estimated as 0.76  $\mu\text{m}$ .

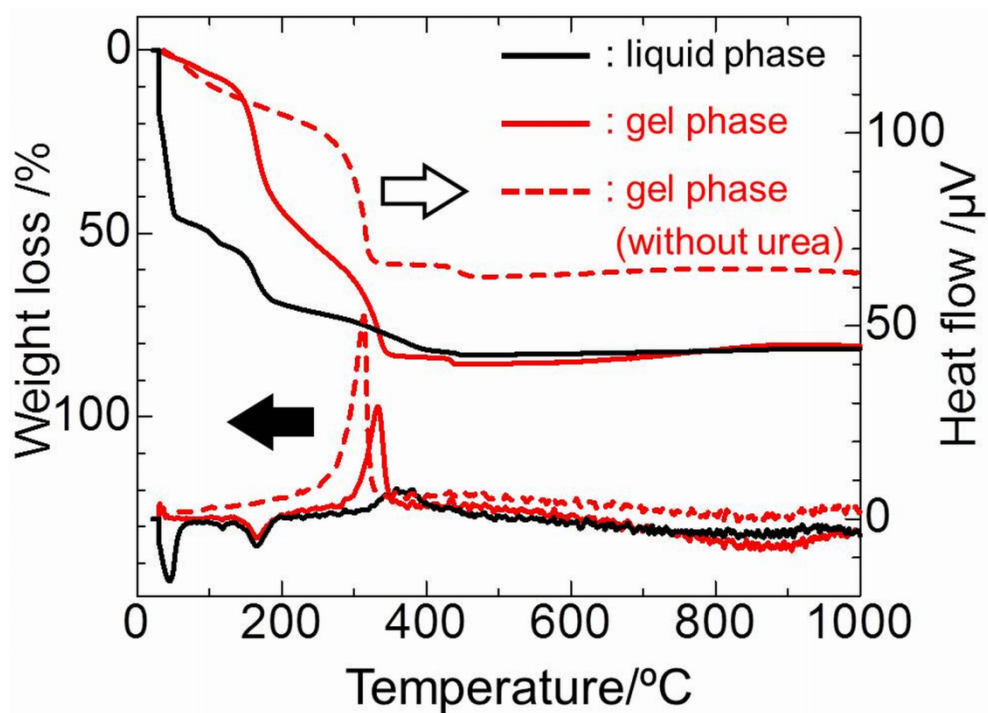

Figure S2 TG-DTA curves for the liquid phase of Cr5-1.6, and the gel phase of Cr5-1.6 and Cr0-1.6 (without urea) under air atmosphere.

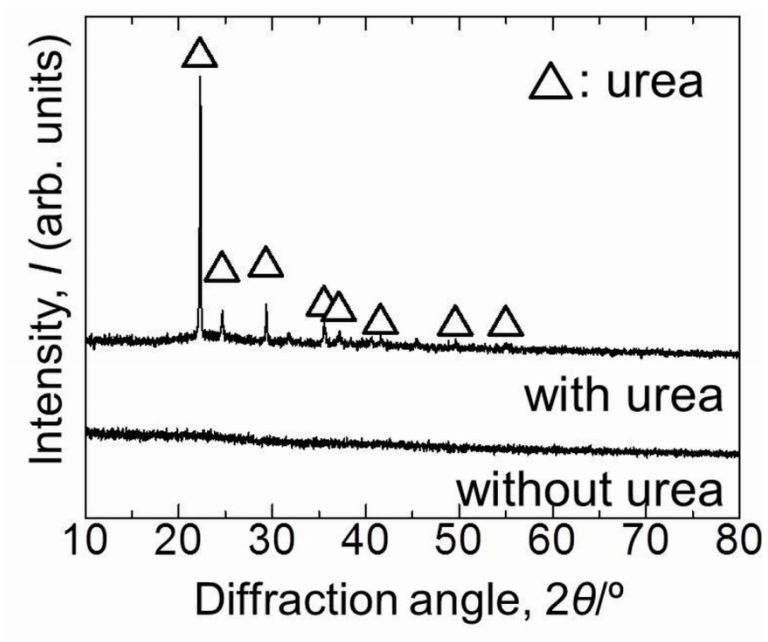

Figure S3 XRD patterns of the xerogels prepared with and without urea; Cr5-1.6 and Cr0-1.6.

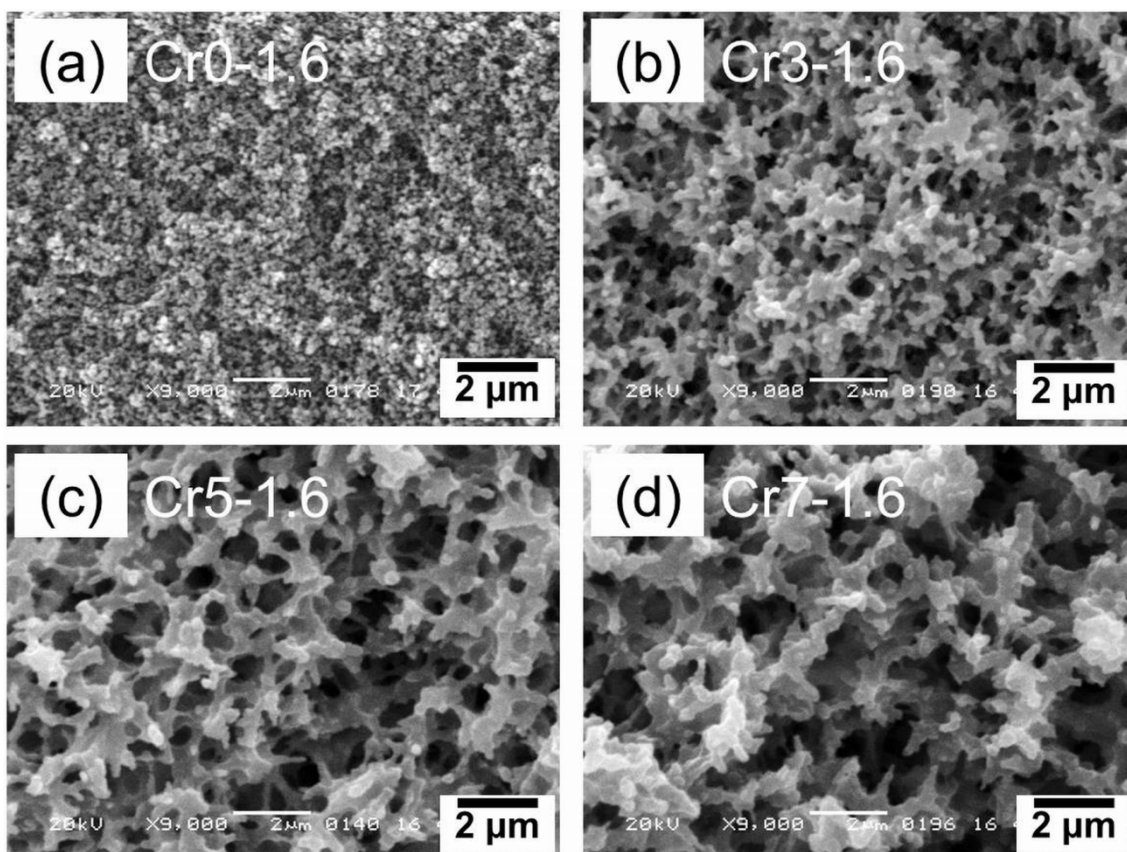

Figure S4 SEM images of the xerogels with varied amount of urea; (a) Cr0-1.6, (b) Cr3-1.6, (c) Cr5-1.6 and (d) Cr7-1.6.

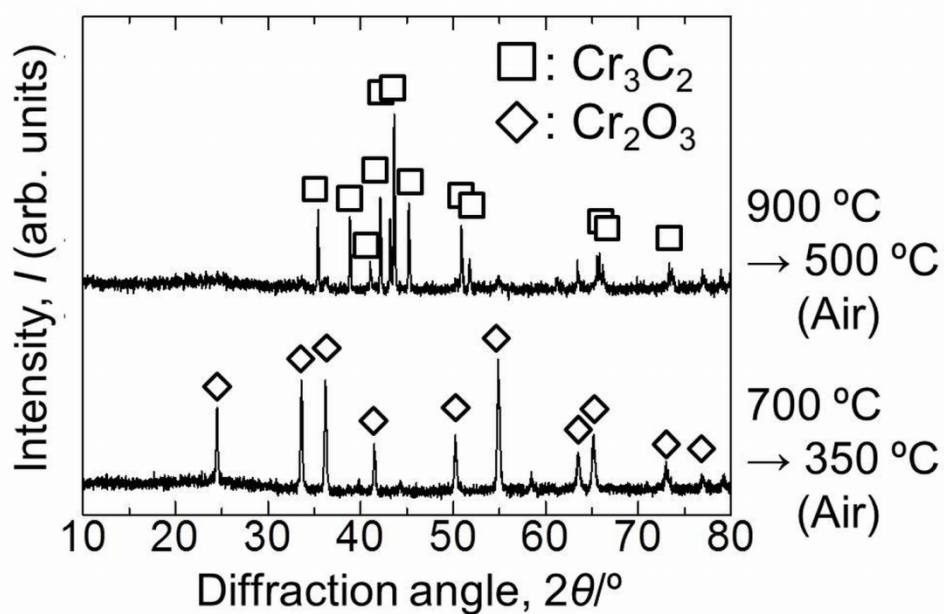

Figure S5 XRD patterns of the sample heat-treated at 700 °C under nitrogen atmosphere followed by heat-treated at 350 °C under air atmosphere, and the sample heat-treated at 900 °C under nitrogen atmosphere followed by heat-treated at 500 °C under air atmosphere.

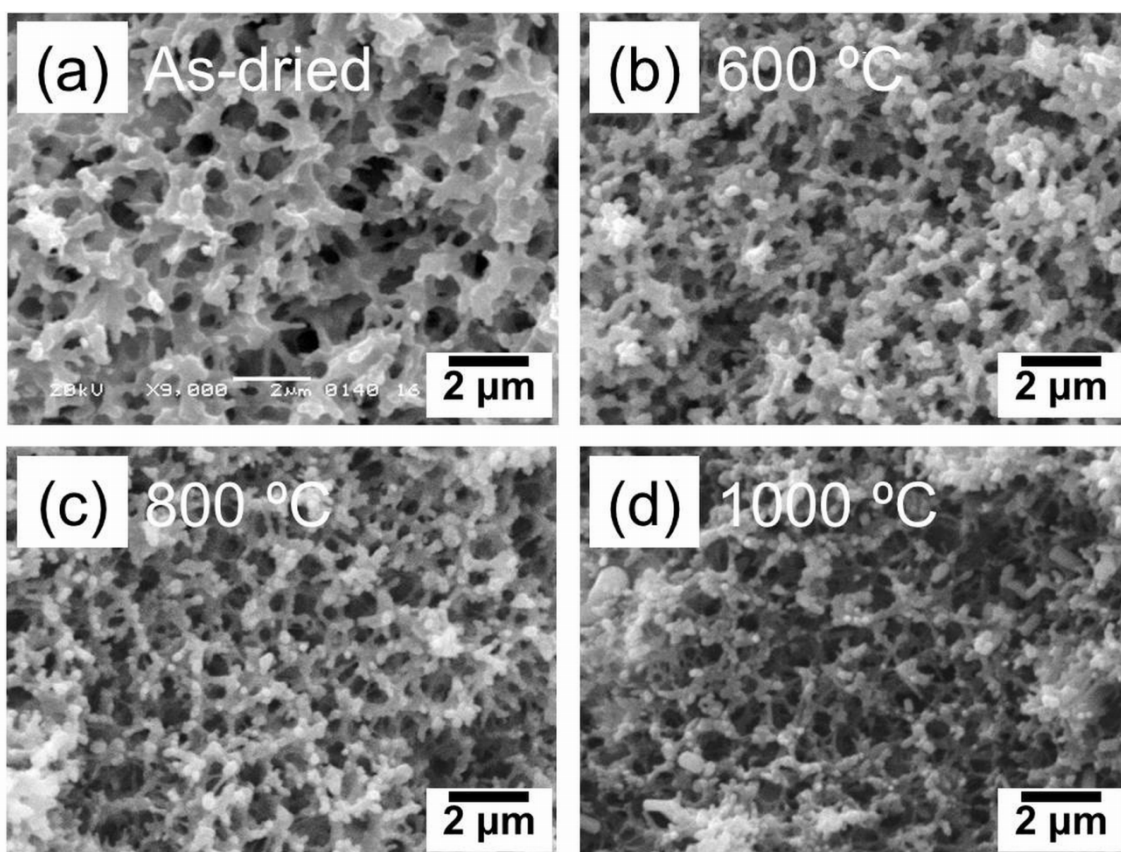

Figure S6 SEM images and appearances of the samples heat-treated at different temperatures; (a) as-dried, (b) 600 °C, (c) 800 °C and (d) 1000 °C.

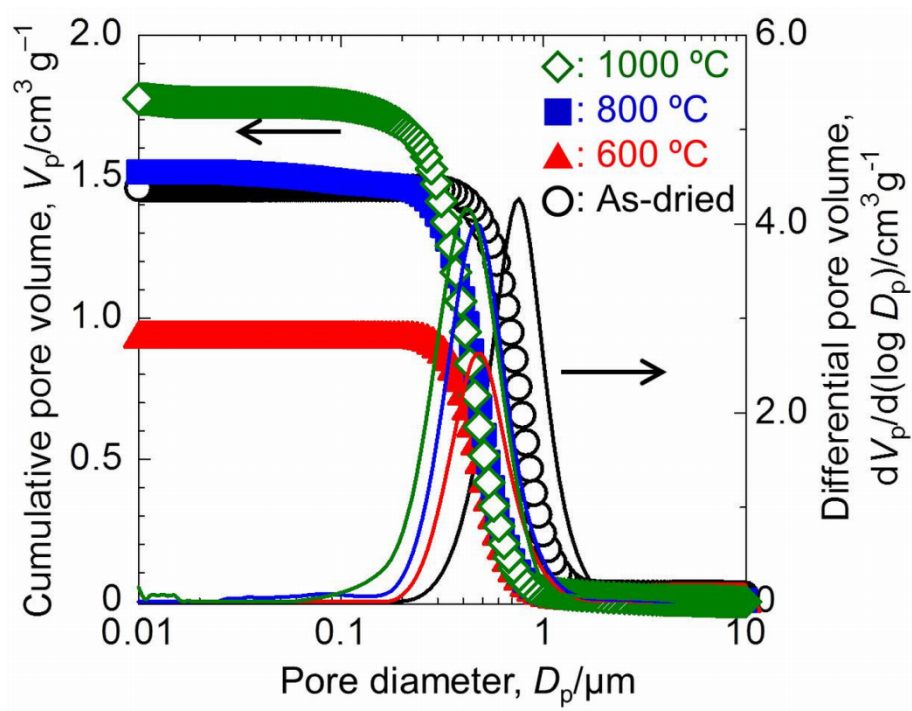

Figure S7 Mercury porosimetry results of the samples heat-treated at different temperatures.
